# Supplementary material for: Study of Iron Piperazine-Based Chelators as Potential Siderophore Mimetics
Source: PubMed Central journal article supplement (PMC6958365; doi:10.3390/ph12040160), 2019-10-23
Supplement: pharmaceuticals-12-00160-s001.pdf [file pharmaceuticals-12-00160-s001.pdf]

Article

# Study of iron piperazine-based chelators as potential siderophore mimetics

Pauline Loupiaz<sup>1</sup>, Isabelle Dechamps<sup>2</sup>, Laurent Dupont<sup>2</sup>, Pierre Vanlemmens<sup>1</sup>, Catherine Mullié<sup>1</sup>, Nicolas Taudon<sup>3</sup>, Anne Bouchut<sup>1</sup>, Alexandra Dassonville-Klimpt<sup>1</sup>, and Pascal Sonnet<sup>1,\*</sup>

<sup>1</sup> AGIR, EA 4294, UFR de Pharmacie, Université de Picardie Jules Verne, 1 rue des Louvels, 80037 Amiens;

<sup>2</sup> ICMR, UMR 7312, 3 Avenue du Maréchal Juin, 51100 Reims;

<sup>3</sup> Unité de Toxicologie Analytique, Institut de Recherche Biomédicales des Armées, 91223 Brétigny-sur-Orge.

\* Correspondence: pascal.sonnet@u-picardie.fr

|                                                                                         |        |
|-----------------------------------------------------------------------------------------|--------|
| NMR, HRMS, HPLC spectra of compounds <b>1 and 2</b>                                     | p.2-7  |
| NMR, HRMS spectra of compounds <b>4-8</b>                                               | p.8-17 |
| General procedure for the synthesis of gallium complexes <b>Ga(III)-1 and Ga(III)-2</b> | p.18   |

# Supplementary Data

*N,N'*-(piperazine-1,4-diylbis(propane-3,1-diyl))bis(2,3-dihydroxybenzamide) (1)

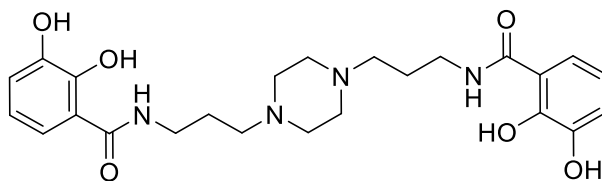

## <sup>1</sup>H NMR

*N,N'*-(piperazine-1,4-diylbis(propane-3,1-diyl))bis(2,3-dihydroxybenzamide) (1)

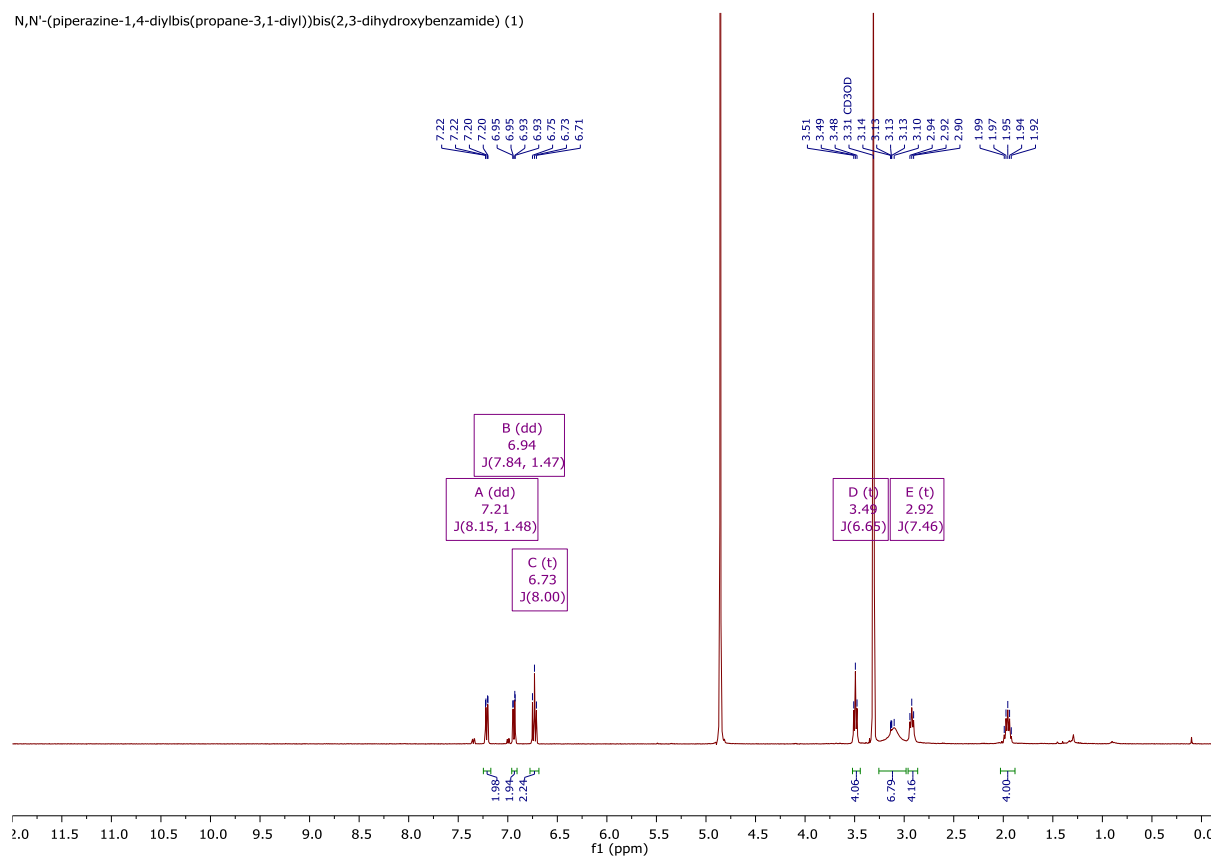

# Supplementary Data

## <sup>13</sup>C NMR

N,N'-(piperazine-1,4-diylobis(propane-3,1-diylobis(2,3-dihydroxybenzamide) (1)

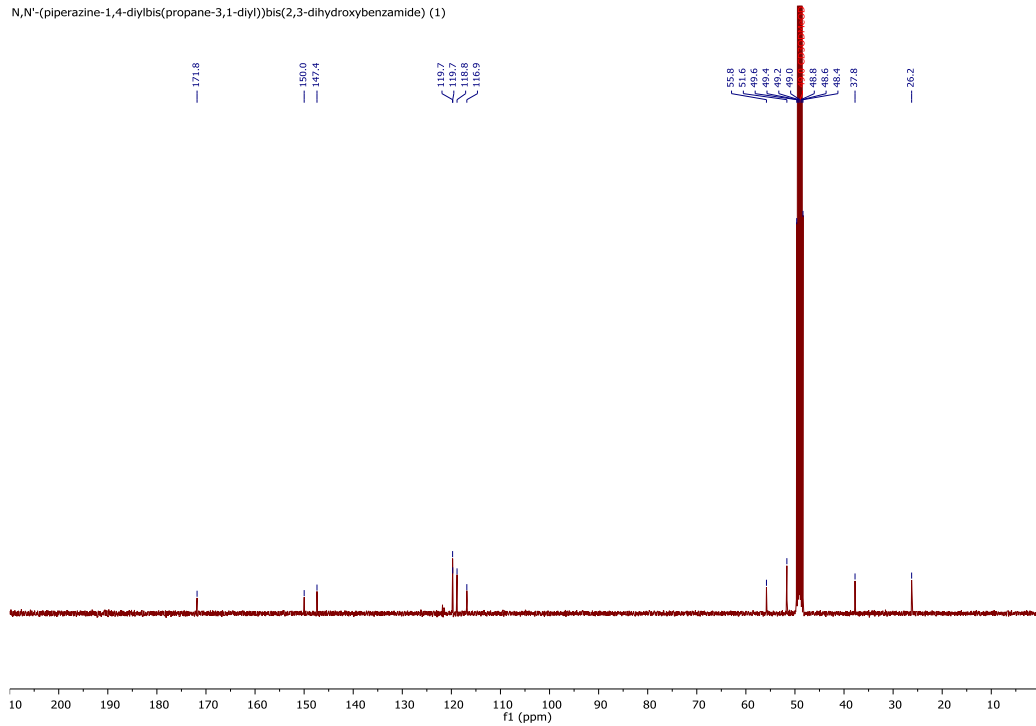

## HRMS

### Single Mass Analysis

Tolerance = 5.0 PPM / DBE: min = -1.5, max = 50.0

Element prediction: Off

Number of isotope peaks used for i-FIT = 3

Monoisotopic Mass, Even Electron Ions

80 formula(e) evaluated with 1 results within limits (all results (up to 1000) for each mass)

Elements Used:

C: 0-25 H: 0-35 N: 1-5 O: 1-10

PL-1-53 24 (0.205) Cm (24:30)

1: TOF MS ES+

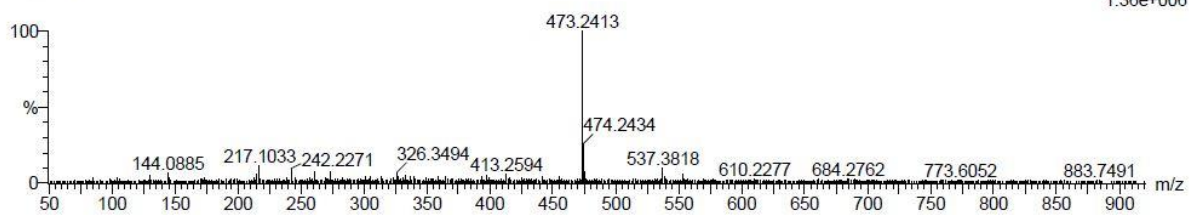

Minimum: -1.5  
Maximum: 5.0 5.0 50.0

| Mass     | Calc. Mass | mDa | PPM | DBE  | i-FIT | Norm | Conf (%) | Formula       |
|----------|------------|-----|-----|------|-------|------|----------|---------------|
| 473.2413 | 473.2400   | 1.3 | 2.7 | 10.5 | 34.6  | n/a  | n/a      | C24 H33 N4 O6 |

# Supplementary Data

## HPLC

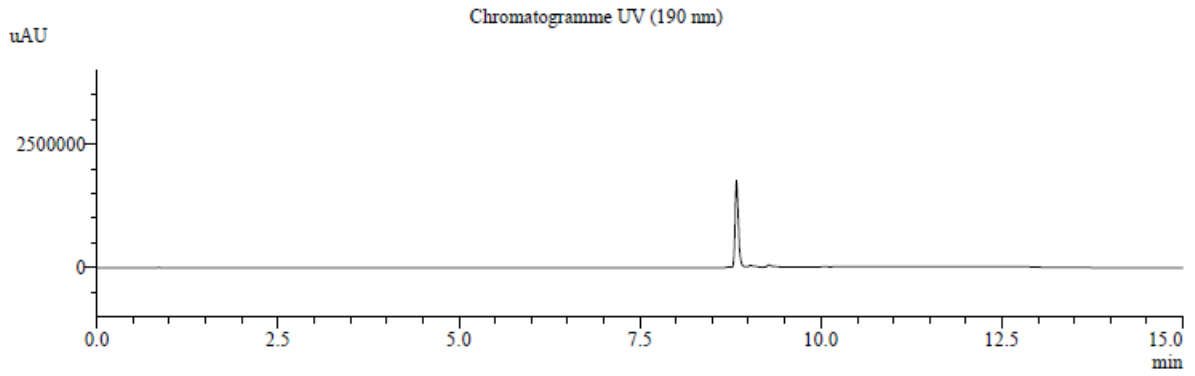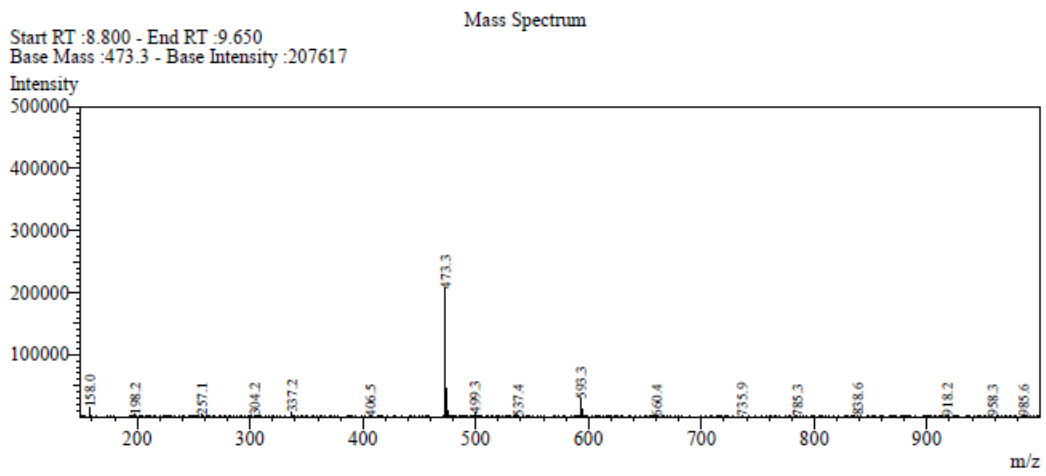

Peak Table

| Peak# | Ret. Time | Area    | Area%   |
|-------|-----------|---------|---------|
| 1     | 8.834     | 5452712 | 96.104  |
| 2     | 9.028     | 116338  | 2.050   |
| 3     | 9.281     | 104724  | 1.846   |
| Total |           | 5673774 | 100.000 |

# Supplementary Data

1,1'-(piperazine-1,4-diylbis(propane-3,1-diyl))bis(3-hydroxy-2-methylpyridin-4(1H)-one) (2)

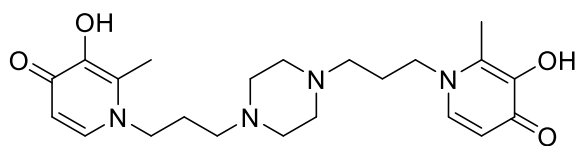

## <sup>1</sup>H NMR

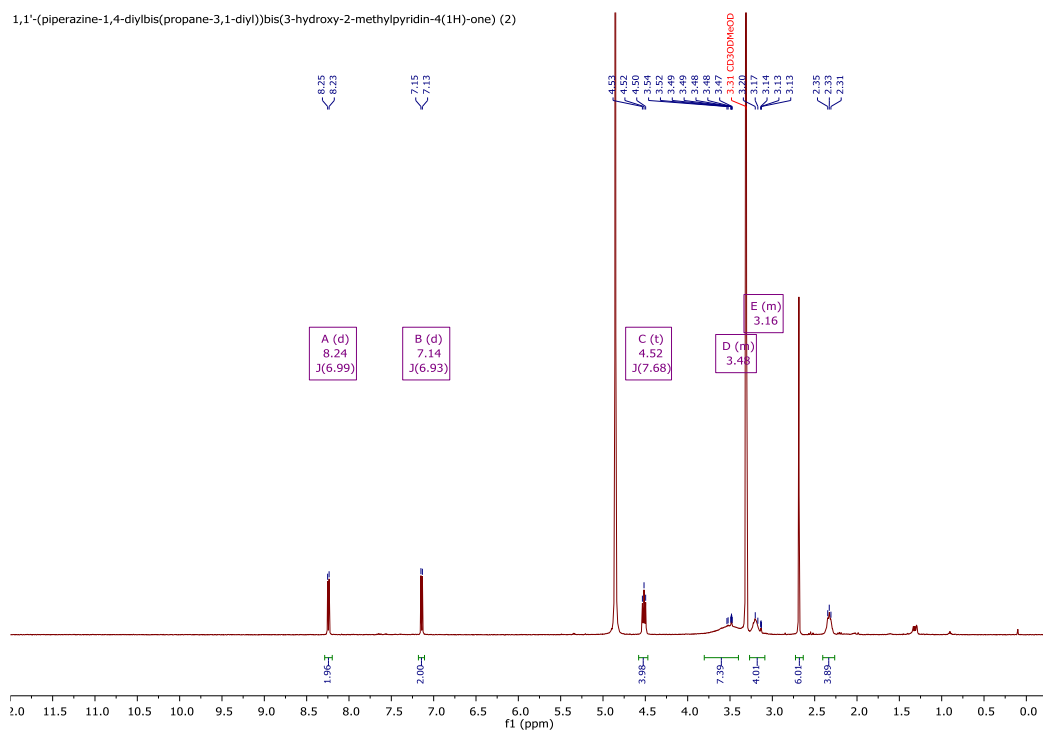

# Supplementary Data

## <sup>13</sup>C NMR

1,1'-(piperazine-1,4-diylobis(propane-3,1-diylobis(3-hydroxy-2-methylpyridin-4(1H)-one) (2)

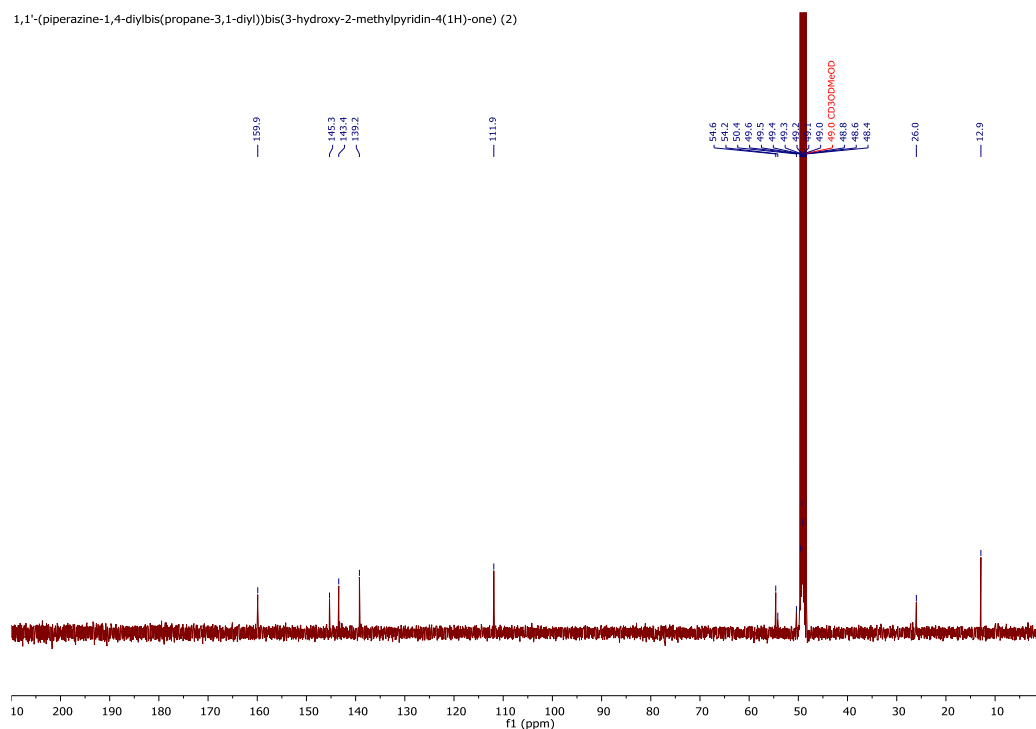

## HRMS

### Single Mass Analysis

Tolerance = 1.0 PPM / DBE: min = -1.5, max = 150.0

Element prediction: Off

Number of isotope peaks used for i-FIT = 4

Monoisotopic Mass, Even Electron Ions

1066 formula(e) evaluated with 1 results within limits (up to 50 closest results for each mass)

Elements Used:

C: 0-30 H: 0-40 N: 0-20 O: 0-20

SD-MP-DIHYDRO-B 22 (0.101) Cm (14:39)

1: TOF MS ES+  
9.66e+006

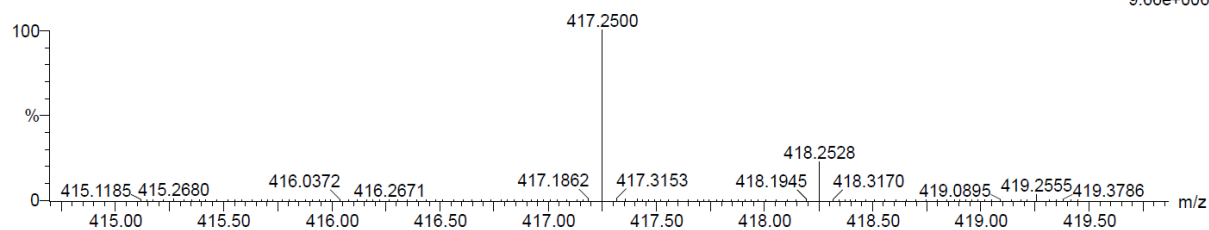

Minimum: -1.5  
Maximum: 2.0 1.0 150.0

| Mass     | Calc. Mass | mDa  | PPM  | DBE | i-FIT | Norm | Conf (%) | Formula       |
|----------|------------|------|------|-----|-------|------|----------|---------------|
| 417.2500 | 417.2502   | -0.2 | -0.5 | 8.5 | 869.0 | n/a  | n/a      | C22 H33 N4 O4 |

# Supplementary Data

## HPLC

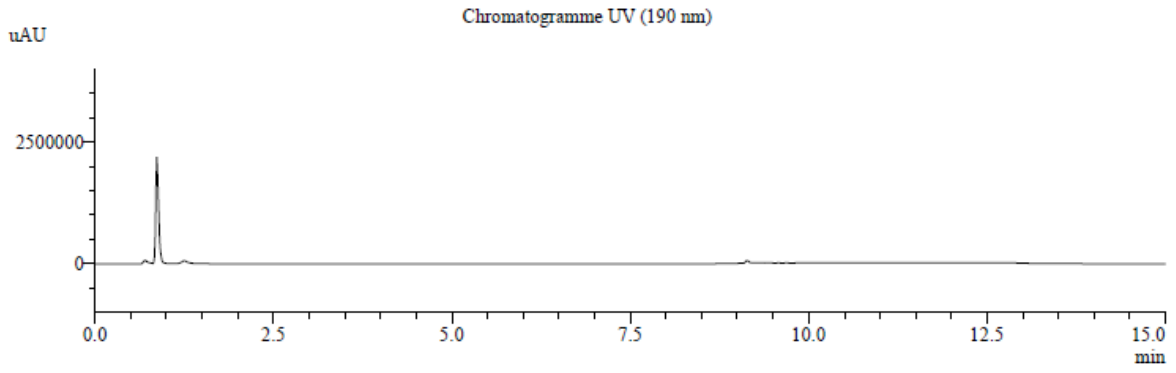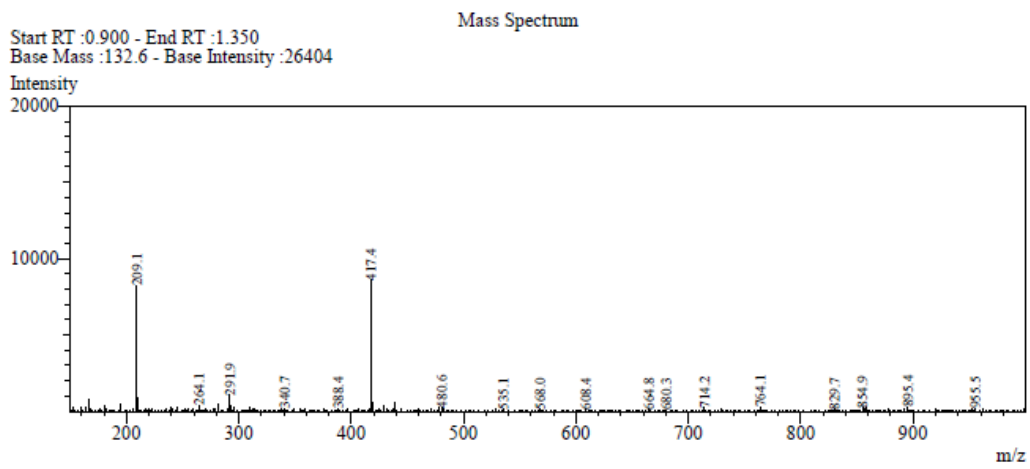

Peak Table

| Peak# | Ret. Time | Area    | Area%   |
|-------|-----------|---------|---------|
| 1     | 0.699     | 263731  | 3.898   |
| 2     | 0.867     | 6206275 | 91.737  |
| 3     | 1.252     | 295270  | 4.364   |
| Total |           | 6765277 | 100.000 |





# Supplementary Data

## <sup>13</sup>C NMR

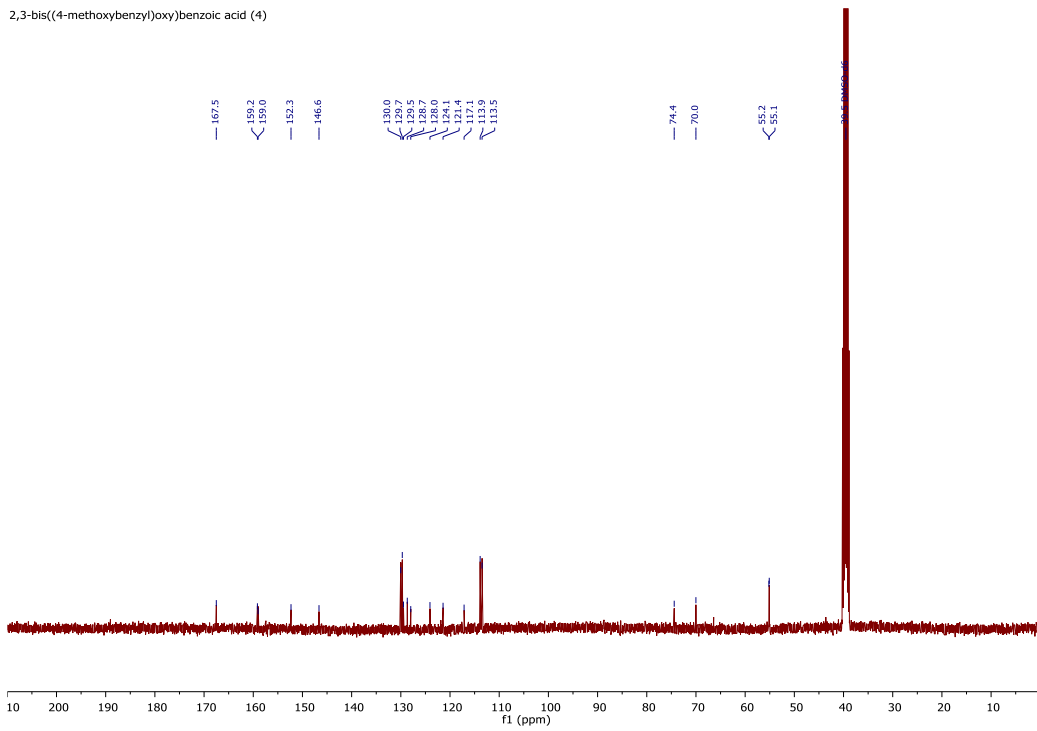

## HRMS

### Elemental Composition Report

Page 1

#### Single Mass Analysis

Tolerance = 5.0 PPM / DBE: min = -1.5, max = 50.0

Element prediction: Off

Number of isotope peaks used for i-FIT = 3

Monoisotopic Mass, Even Electron Ions

26 formula(e) evaluated with 1 results within limits (all results (up to 1000) for each mass)

Elements Used:

C: 0-25 H: 0-25 O: 1-10 Na: 0-1

PL1-06 19 (0.159)

1: TOF MS ES+

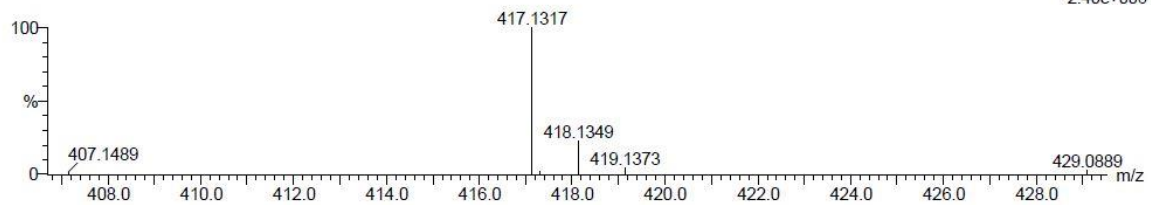

Minimum: -1.5  
Maximum: 5.0 5.0 50.0

| Mass     | Calc. Mass | mDa | PPM | DBE  | i-FIT | Norm | Conf(%) | Formula       |
|----------|------------|-----|-----|------|-------|------|---------|---------------|
| 417.1317 | 417.1314   | 0.3 | 0.7 | 12.5 | 47.2  | n/a  | n/a     | C23 H22 O6 Na |

# Supplementary Data

## 3-((4-methoxybenzyl)oxy)-2-methyl-4H-pyran-4-one (5)

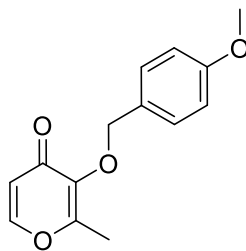

### <sup>1</sup>H NMR

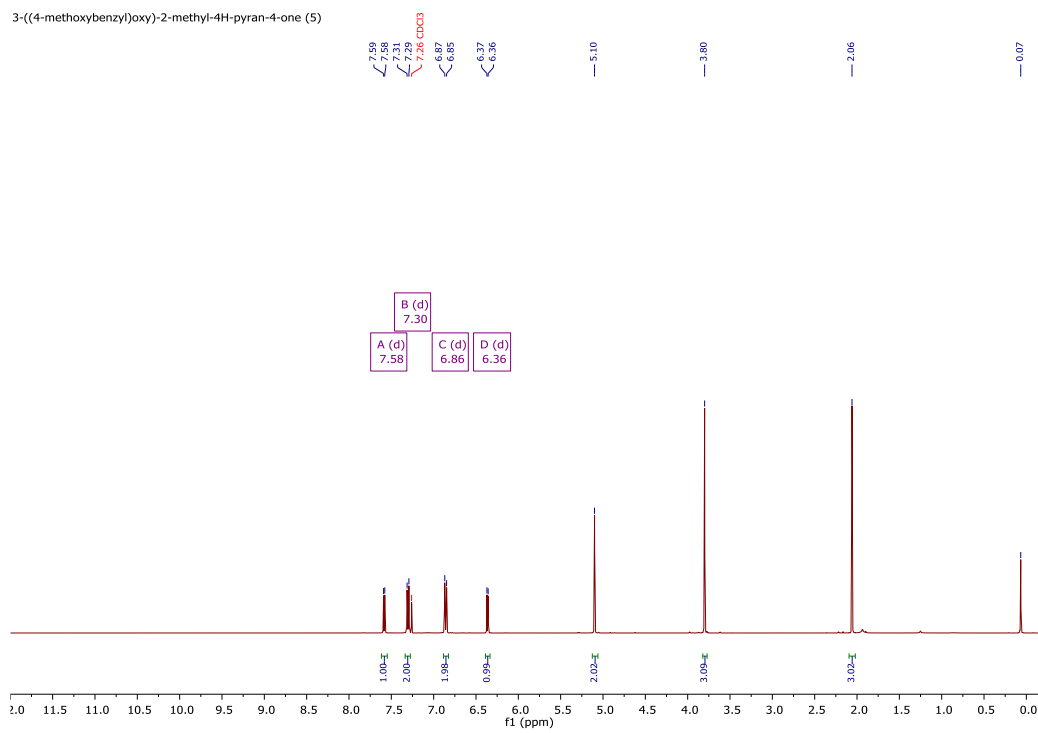

# Supplementary Data

## <sup>13</sup>C NMR

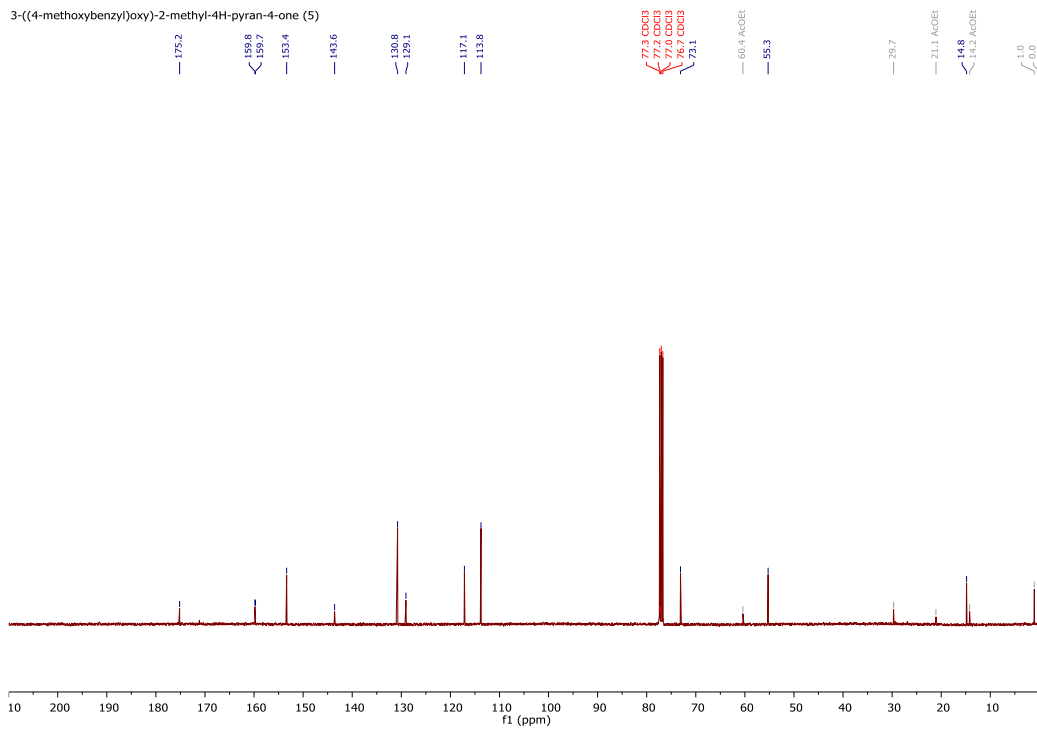

## HRMS

### Single Mass Analysis

Tolerance = 2.0 PPM / DBE: min = -1.5, max = 150.0

Element prediction: Off

Number of isotope peaks used for i-FIT = 4

Monoisotopic Mass, Even Electron Ions

95 formula(e) evaluated with 1 results within limits (up to 50 closest results for each mass)

Elements Used:

C: 0-40 H: 0-60 O: 0-10 Na: 0-2

SD-PL1-20 25 (0.112) Cm (16:39)

1: TOF MS ES+  
2.62e+007

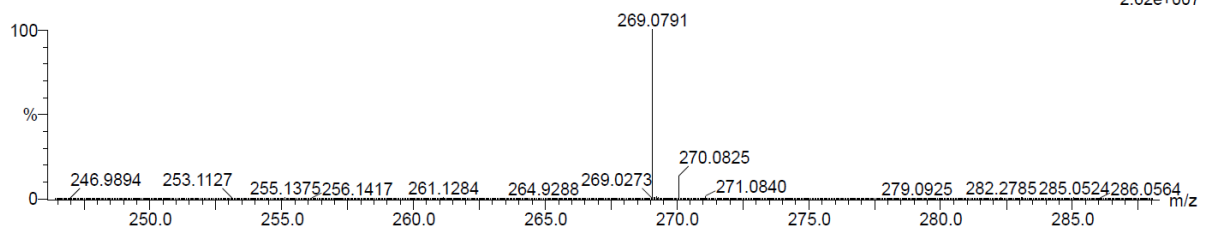

Minimum: -1.5  
Maximum: 2.0 2.0 150.0

| Mass     | Calc. Mass | mDa | PPM | DBE | i-FIT  | Norm | Conf (%) | Formula       |
|----------|------------|-----|-----|-----|--------|------|----------|---------------|
| 269.0791 | 269.0790   | 0.1 | 0.4 | 7.5 | 1325.0 | n/a  | n/a      | C14 H14 O4 Na |

# Supplementary Data

## 4-methoxybenzyl 2,3-bis((4-methoxybenzyl)oxy)benzoate (6)

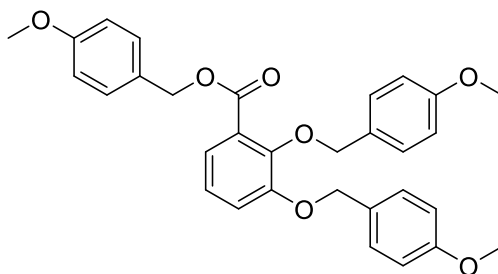

### <sup>1</sup>H NMR

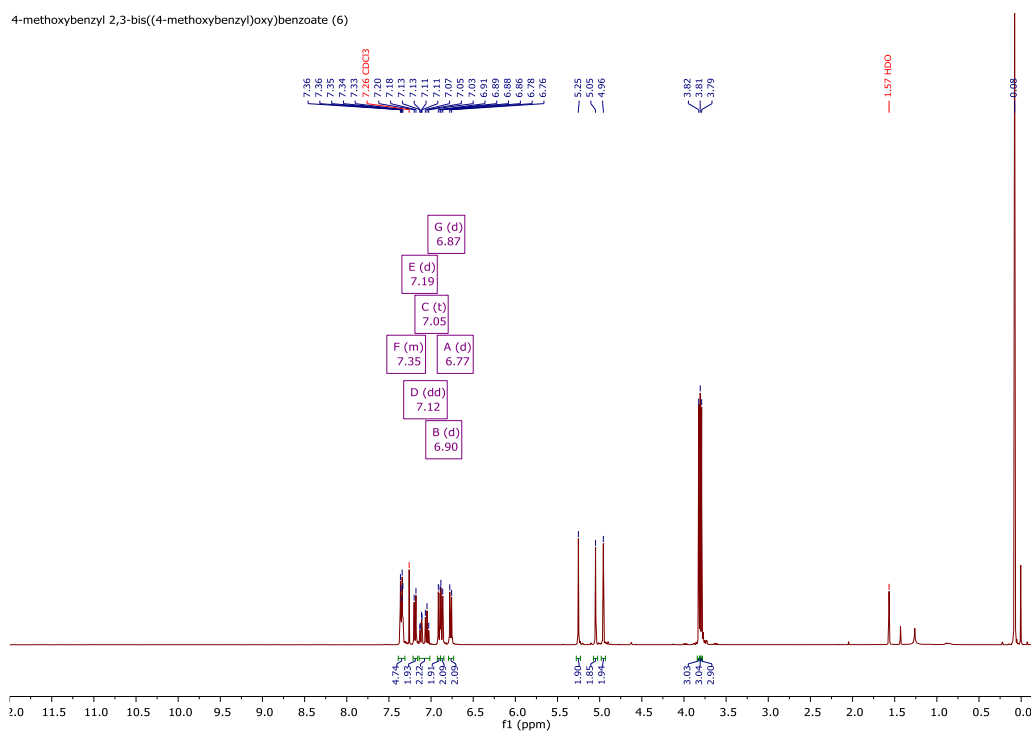

# Supplementary Data

## <sup>13</sup>C NMR

4-methoxybenzyl 2,3-bis((4-methoxybenzyl)oxy)benzoate (6)

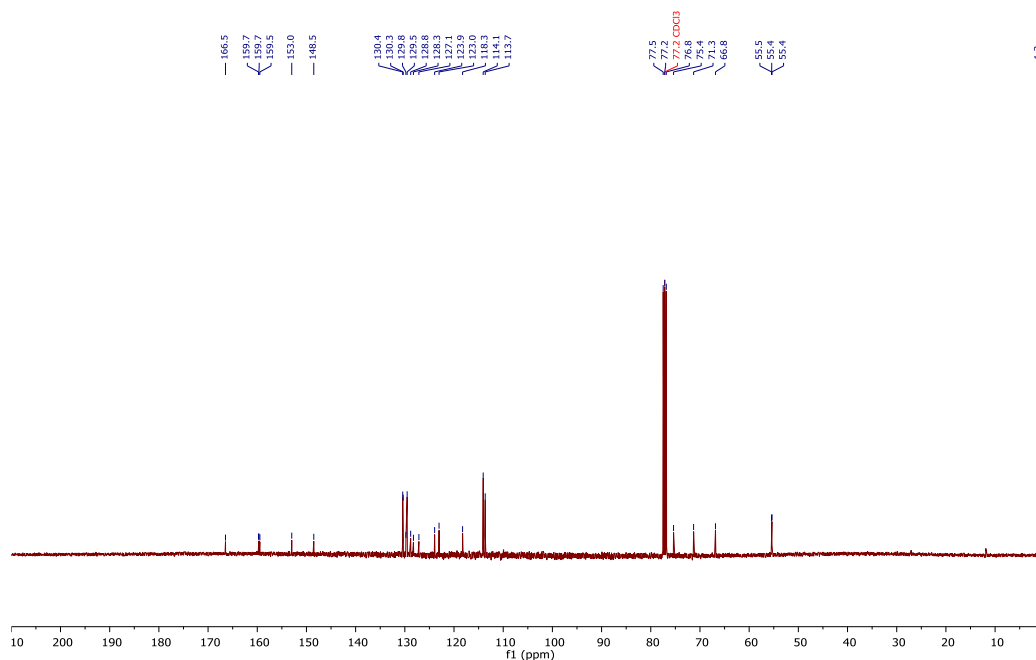

## HRMS

### Single Mass Analysis

Tolerance = 2.0 PPM / DBE: min = -1.5, max = 150.0

Element prediction: Off

Number of isotope peaks used for i-FIT = 4

Monoisotopic Mass, Even Electron Ions

155 formula(e) evaluated with 1 results within limits (up to 50 closest results for each mass)

Elements Used:

C: 0-40 H: 0-60 O: 0-10 Na: 0-2

SD-MS5 25 (0.112) Cm (25:71)

1: TOF MS ES+  
2.20e+007

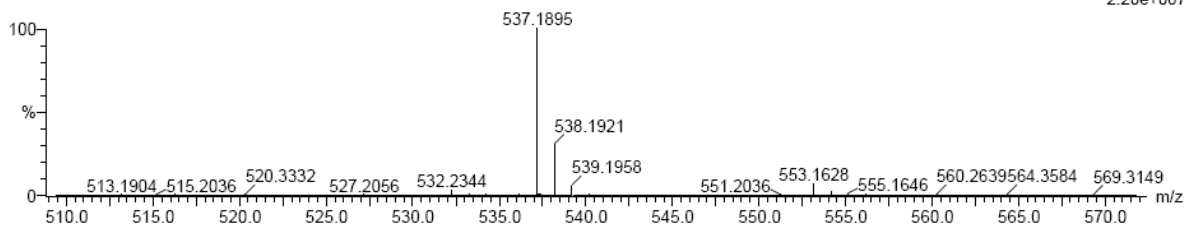

Minimum: -1.5  
Maximum: 2.0 2.0 150.0

| Mass     | Calc. Mass | mDa | PPM | DBE  | i-FIT  | Norm | Conf (%) | Formula       |
|----------|------------|-----|-----|------|--------|------|----------|---------------|
| 537.1895 | 537.1889   | 0.6 | 1.1 | 16.5 | 1360.7 | n/a  | n/a      | C31 H30 O7 Na |

# Supplementary Data

*N,N'*-(piperazine-1,4-diylbis(propane-3,1-diyl))bis(2,3-bis((4-methoxybenzyl)oxy)benzamide)  
(7)

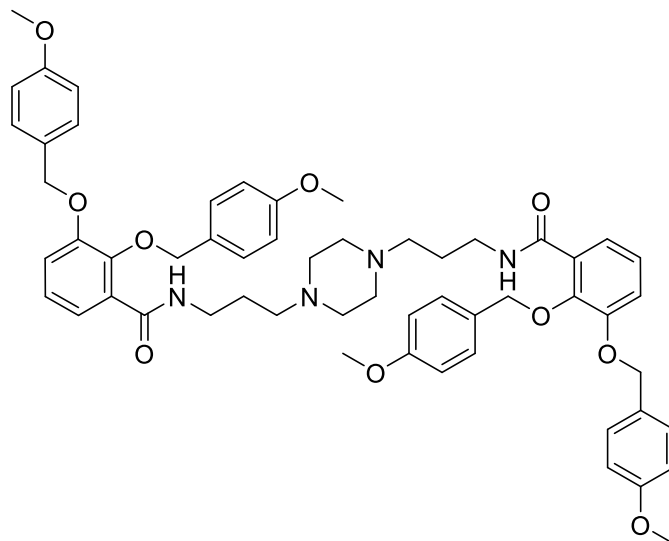

## <sup>1</sup>H NMR

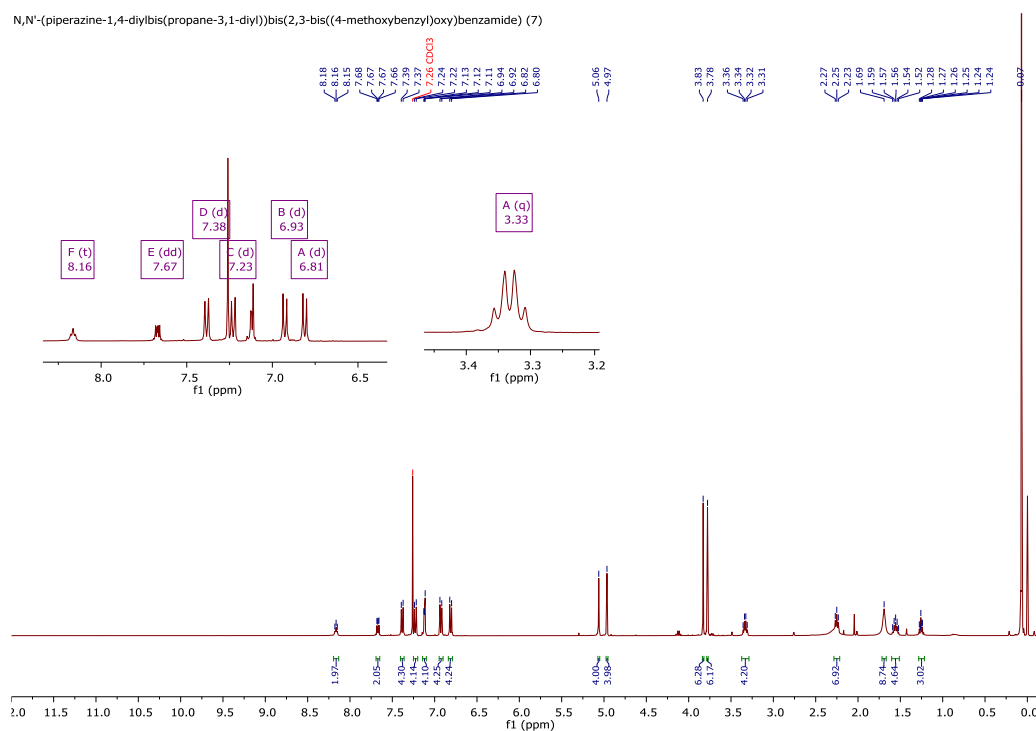

# Supplementary Data

## <sup>13</sup>C NMR

N,N'-(piperazine-1,4-diylobis(propane-3,1-diylobis(2,3-bis(4-methoxybenzyl)oxy)benzamide) (7)

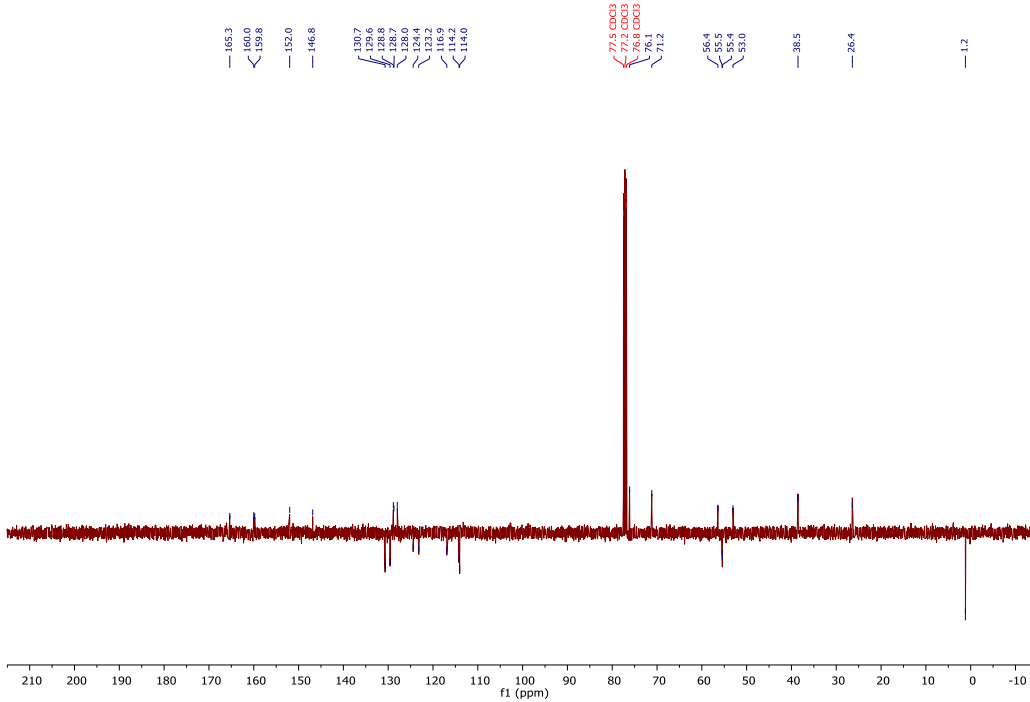

## HRMS

### Single Mass Analysis

Tolerance = 1.0 PPM / DBE: min = -1.5, max = 150.0

Element prediction: Off

Number of isotope peaks used for i-FIT = 4

Monoisotopic Mass, Even Electron Ions

229 formula(e) evaluated with 1 results within limits (up to 50 closest results for each mass)

Elements Used:

C: 0-60 H: 0-70 N: 0-5 O: 0-15

SD-MS4 48 (0.201) Cm (48:79)

1: TOF MS ES+  
1.93e+007

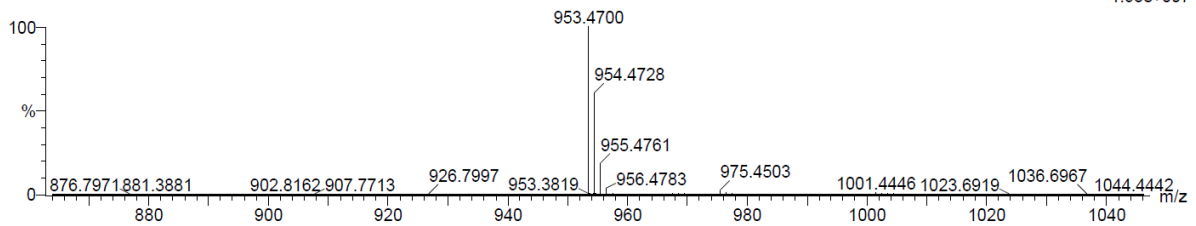

Minimum: -1.5  
Maximum: 2.0 1.0 150.0

| Mass     | Calc. Mass | mDa  | PPM  | DBE  | i-FIT  | Norm | Conf (%) | Formula        |
|----------|------------|------|------|------|--------|------|----------|----------------|
| 953.4700 | 953.4701   | -0.1 | -0.1 | 26.5 | 1324.0 | n/a  | n/a      | C56 H65 N4 O10 |

# Supplementary Data

1,1'-(piperazine-1,4-diylbis(propane-3,1-diyl))bis(3-((4-methoxybenzyl)oxy)-2-methylpyridin-4(1H)-one) (8)

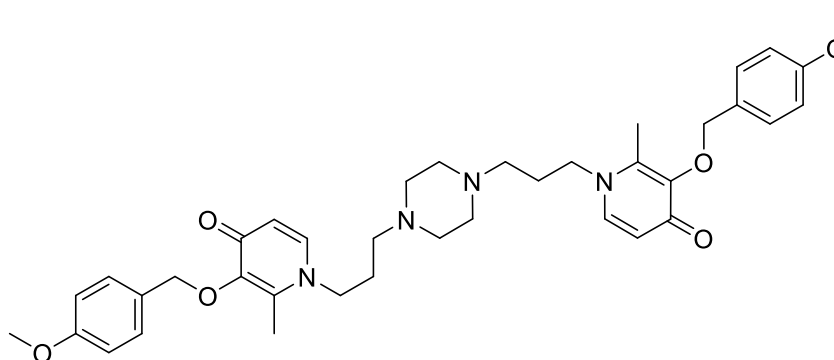

## <sup>1</sup>H NMR

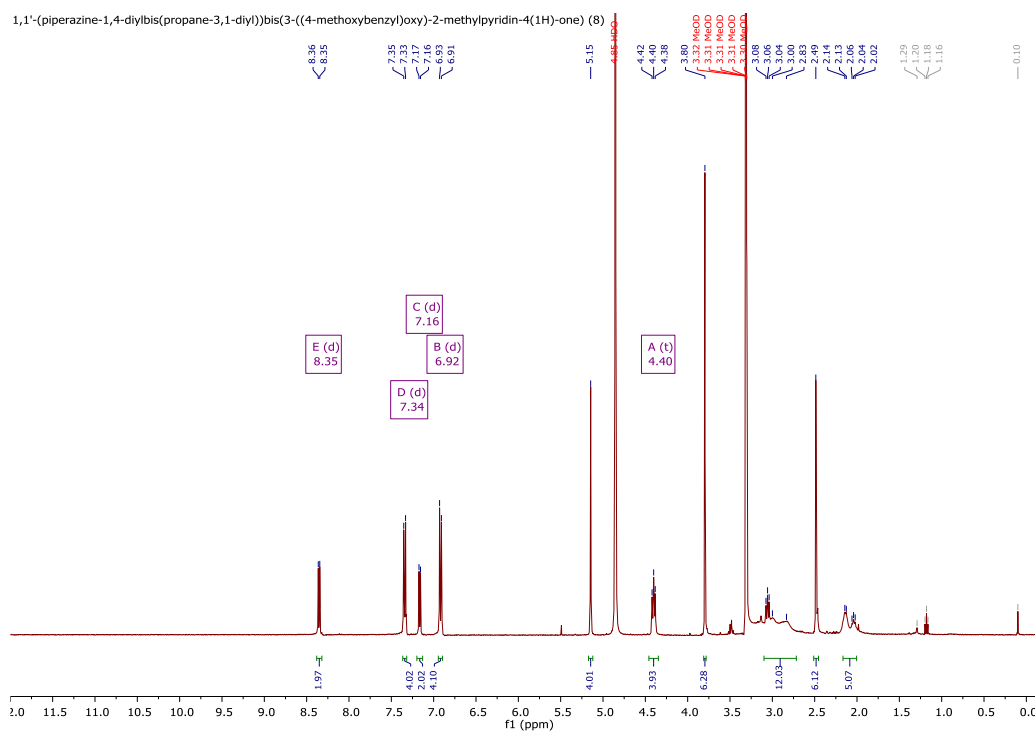



# Supplementary Data

## <sup>13</sup>C NMR

1,1'-(piperazine-1,4-diylobis(propane-3,1-diy))bis(3-((4-methoxybenzyl)oxy)-2-methylpyridin-4(1H)-one) (8)

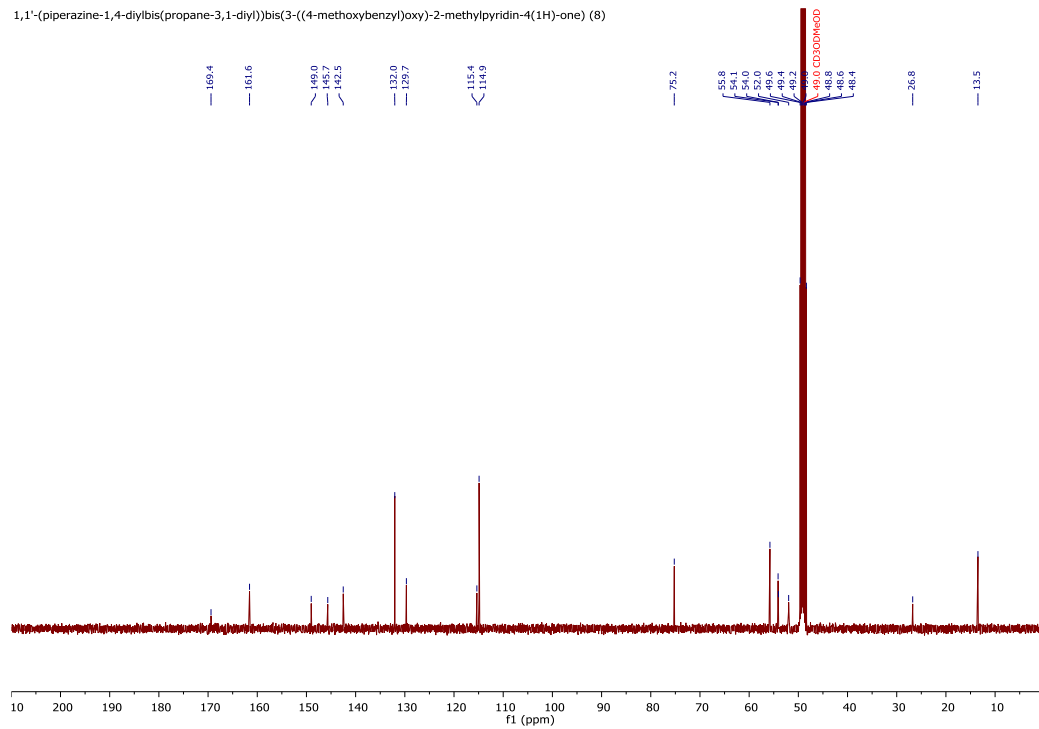

## HRMS

### Single Mass Analysis

Tolerance = 1.0 PPM / DBE: min = -1.5, max = 150.0

Element prediction: Off

Number of isotope peaks used for i-FIT = 4

Monoisotopic Mass, Even Electron Ions

576 formula(e) evaluated with 1 results within limits (up to 50 closest results for each mass)

Elements Used:

C: 0-60 H: 0-70 N: 0-5 O: 0-15

SD-MS3 43 (0.176) Cm (43:83)

1: TOF MS ES+  
4.41e+007

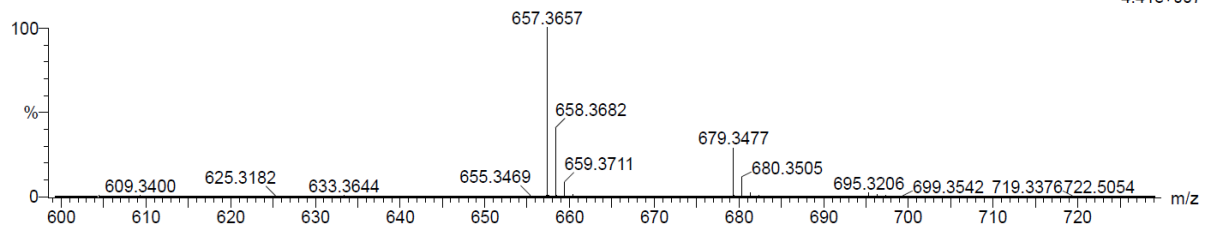

Minimum:

Maximum: 2.0 1.0 -1.5

| Mass     | Calc. Mass | mDa | PPM | DBE  | i-FIT  | Norm | Conf (%) | Formula       |
|----------|------------|-----|-----|------|--------|------|----------|---------------|
| 657.3657 | 657.3652   | 0.5 | 0.8 | 16.5 | 1434.7 | n/a  | n/a      | C38 H49 N4 O6 |

## Supplementary Data

---

**General procedure for the synthesis of gallium complexes Ga(III)-1 and Ga(III)-2.** The ligand **1** or **2** (1 eq.) was dissolved in MeOH (10 mL). Tris.HCl was added until pH = 7. The complex Ga(acetylacetonate)<sub>3</sub> (26-25 mg, 1.5 eq.) was dissolved in MeOH before addition of Tris.HCl until pH = 7. This mixture was then added in the ligand methanol solution. The corresponding solution was stirred at 40 °C for 3 hours and after at room temperature for 21 hours. Before lyophilization the methanol was evaporated to afford the corresponding gallium complexes-**1** or **2**.

*Ga(III)-1.* Compound **Ga(III)-1** was obtained from **1** (50mg, 0.105 mmol) according to the general procedure as a pink solid (110 mg).

*Ga(III)-2.* Compound **Ga(III)-2** was obtained from **2** (50mg, 0.1 mmol) according to the general procedure as a white solid (100 mg).
